# Supplementary material for: A supramolecular probe of cyanine dye for Pb2+ detection based on the recognition of a G-quadruplex from DNA duplexes
Source: Royal Society of Chemistry journal article supplement (doi:10.1039/c9ay02446h), 2020-01-01
Supplement: c9ay02446h1.pdf [file c9ay02446h1.pdf]

# A Supramolecular Probe for Pb<sup>2+</sup> Detection Based on Recognition of G-quadruplex from Duplex DNAs

Lijia Yu<sup>#1, \*</sup>, Han Zhao<sup>#1</sup>, Nannan Jing<sup>2</sup>, Xiaodong Shi<sup>1</sup>, Yinglin Zhang<sup>1</sup>, Chunguang Ding<sup>1</sup>, Yansong Zhang<sup>1</sup>, Jingguang Fan<sup>1, \*</sup> and Yalin Tang<sup>3</sup>

<sup>1</sup> National Center for Occupational Safety and Health, National Health Commission of the People's Republic of China, Beijing, China

\* Correspondence: yulijiajiayou@163.com (L.Y.); fan-jg@263.net (F.J.)

<sup>2</sup> State Key Laboratory of Natural and Biomimetic Drugs, Peking University, Beijing 100191, China

<sup>3</sup> Beijing National Laboratory for Molecular Science, Center for Molecular Science, State Key Laboratory for Structural Chemistry for Unstable and State Species, Institute of Chemistry, Chinese Academy of Sciences, Beijing 100190, China

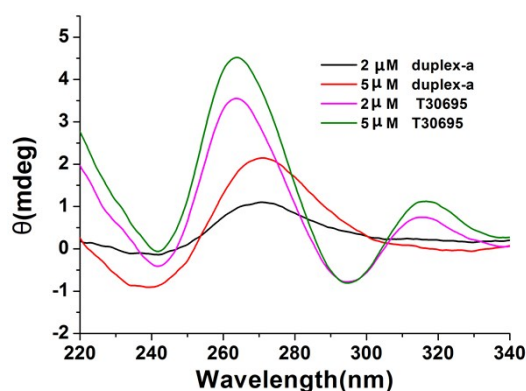

Figure S1. The CD spectra of 2 μM and 5 μM duplex-a in water. The CD spectra of 2 μM and 5 μM T30695 in the presence of 35 μM Pb<sup>2+</sup>.

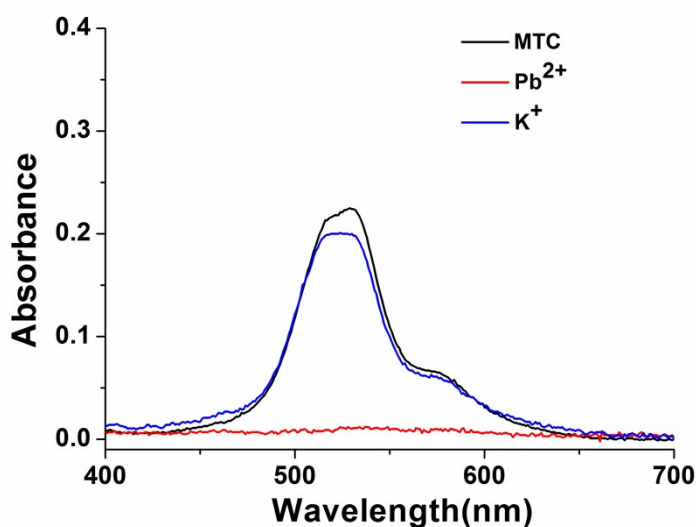

Figure S2. The absorption spectra of 4 μM MTC without metal ion, with 5 μM Pb<sup>2+</sup> or K<sup>+</sup>.

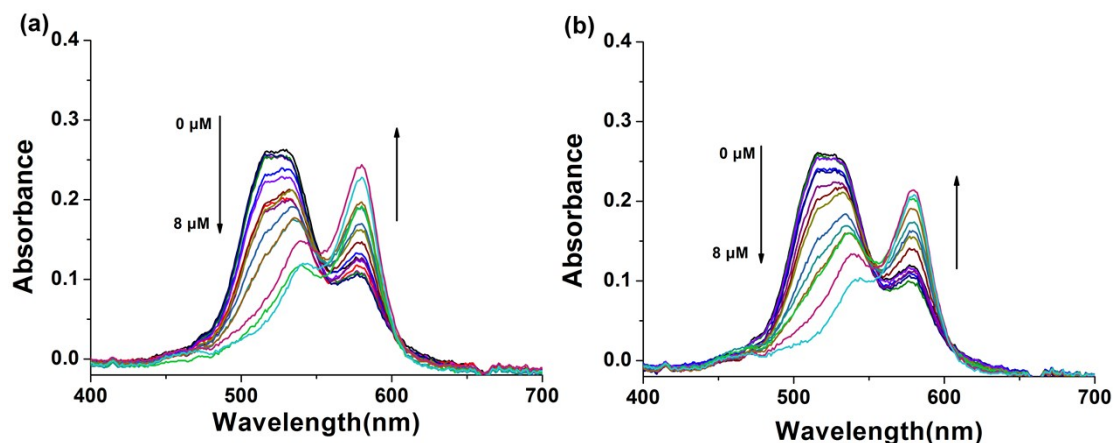

Figure S3. The two repetitive detection for  $\text{Pb}^{2+}$  experiments. Absorption spectra of 4  $\mu\text{M}$  MTC and 2  $\mu\text{M}$  duplex-a DNA with the increasing  $[\text{Pb}^{2+}]$ .

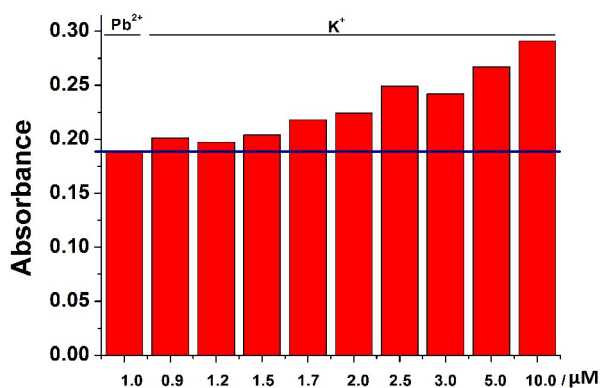

Figure S4. The absorption value at 580 nm of adding different concentrations of  $\text{K}^+$  to 4  $\mu\text{M}$  MTC and 2  $\mu\text{M}$  duplex-a DNA in the presence of 1  $\mu\text{M}$   $\text{Pb}^{2+}$ .

Table S1. The computational detail of slope.

| Concentration (nM)                      | 10    | 60    | 90    | 250   | 750   |
|-----------------------------------------|-------|-------|-------|-------|-------|
| $\text{Log}_{10}(\text{concentration})$ | 1     | 1.78  | 1.95  | 2.40  | 2.88  |
| A                                       | 0.211 | 0.198 | 0.197 | 0.188 | 0.175 |
| $A_0$                                   | 0.247 | 0.247 | 0.247 | 0.247 | 0.247 |
| $1-(A/A_0)$                             | 0.146 | 0.198 | 0.202 | 0.238 | 0.292 |

We have chosen five concentrations as following, 10 nM, 60 nM, 90 nM, 250 nM and 750 nM. 1, 1.78, 1.95, 2.4, 2.88 were obtained when these values were calculated by  $\text{Log}_{10}$ . Then these five value were as X axes. The absorbance at 518 nm (Table S1, A) of 10 nM, 60 nM, 90 nM, 250 nM and 750 nM were 0.211, 0.198, 0.197, 0.188 and 0.175.  $A_0$  represents absorbance at 518 nm of 4  $\mu\text{M}$  MTC and 0.5  $\mu\text{M}$  duplex-a without  $\text{Pb}^{2+}$ . The value of  $1-(A/A_0)$  was calculated and obtained, which were used as Y axes. The slope of 0.07591 were obtained.

The value of  $\sigma$  was calculated from the standard deviation of three blank samples (absorbance at 518 nm, 0.082, 0.068, 0.099), which is 0.01522.
